# Supplementary material
Source: publisher site journal article supplement (https://www.spandidos-publications.com/5840/downloadSupplementary)

Figure S1. The identification of the primary RPMVECs (magnification, x200). (A) passage 1 cells; (B) passage 2 cells; (C) cells stained with anti-CD31 (one of the vascular endothelial cell markers) antibody. RPMVECs, primary rat pulmonary micro vascular cells.

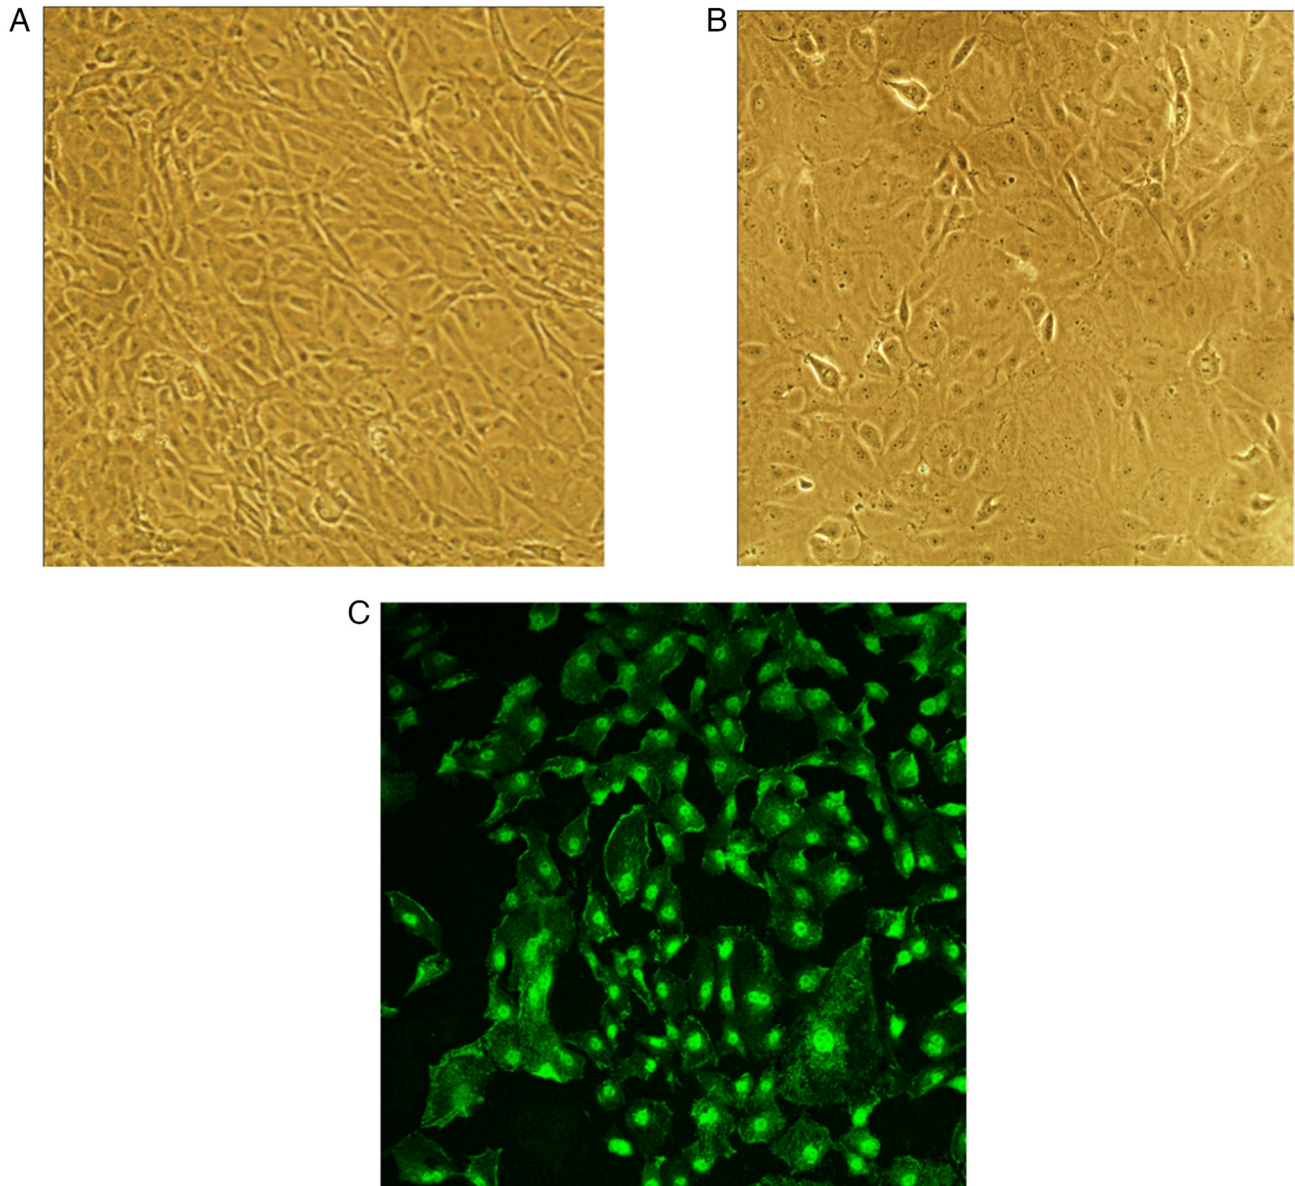

Supplement: Supplementary file 1 [file downloadSupplementary]
